# Supplementary material for: Untangling Species-Level Composition of Complex Bacterial Communities through a Novel Metagenomic Approach
Source: PubMed Central journal article supplement (PMC7394355; doi:10.1128/msystems.00404-20), 2020-07-28
Supplement: mSystems.00404-20-sf001.pdf [file mSystems.00404-20-sf001.pdf]

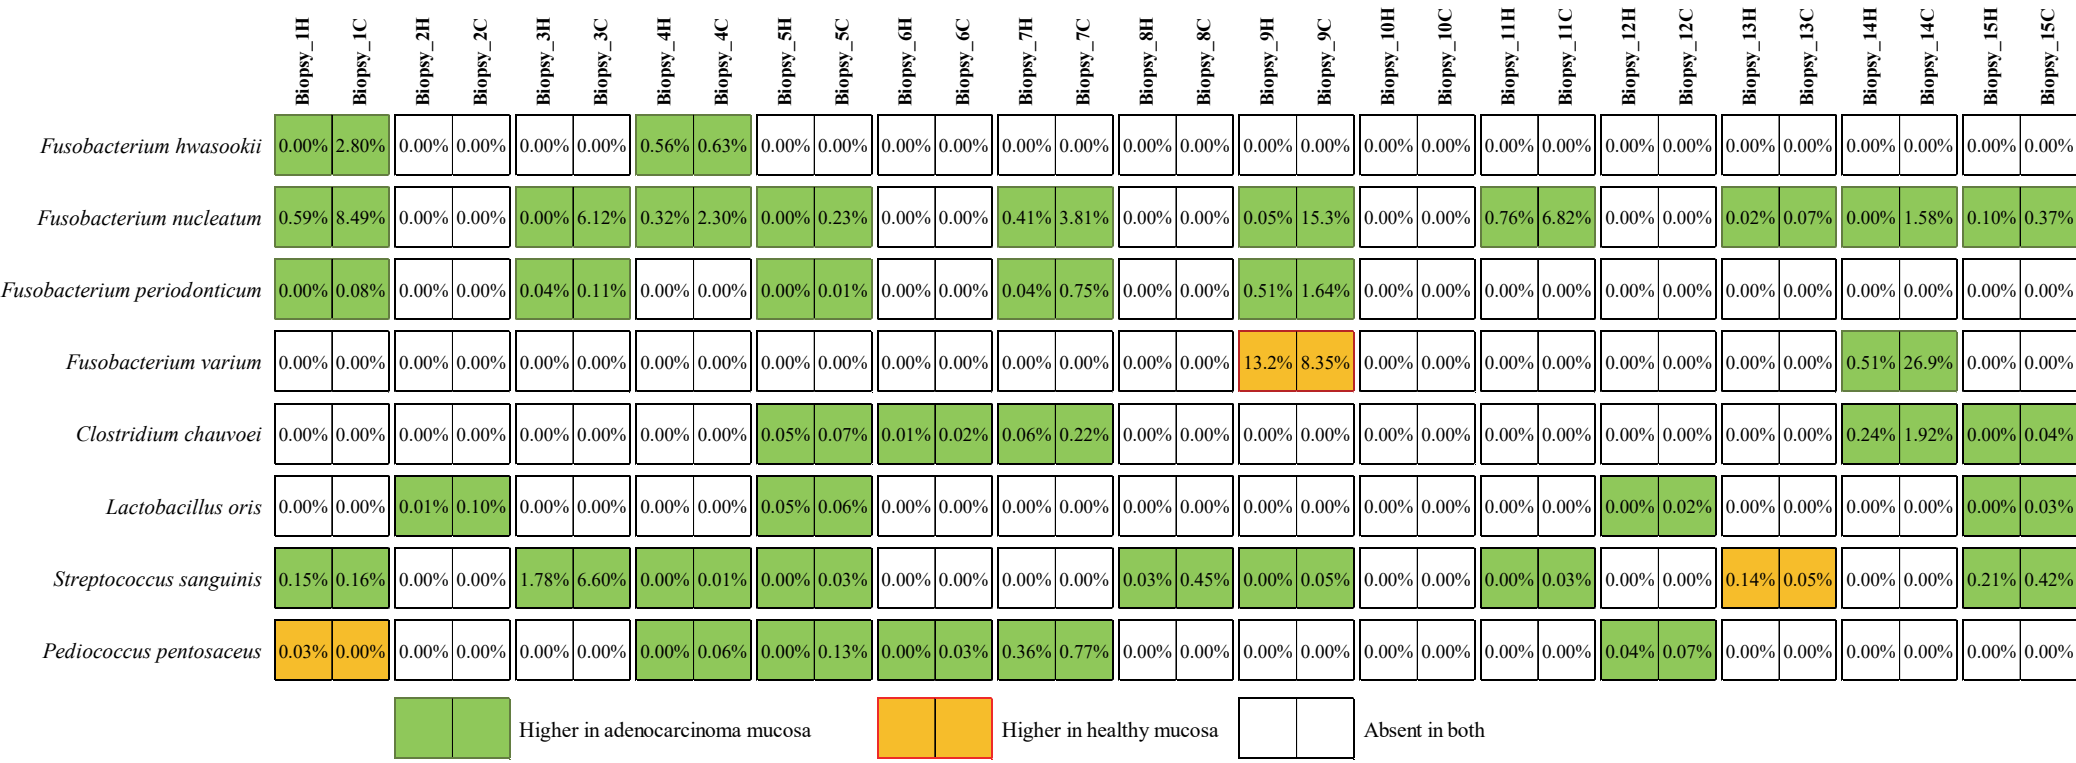

**Figure S1**
